1                    ***Symptoms expression of bakanae disease following seed treatment with***  
2                    ***phytohormone and metabolites***

3  
4  
5  
6   **Shireen A. Jahan Quazi<sup>1\*</sup>, Sariah Meon<sup>2¶</sup>, Zainal Abidin B.M. Ahmad<sup>2¶</sup> and Hawa Jaafar<sup>3¶</sup>**

7   *<sup>1</sup>Plant Pathology Division, Bangladesh Rice Research Institute, Gazipur, Bangladesh*

8   *<sup>2</sup>Department of Plant Protection, Universiti Putra Malaysia, Serdang, Selangor, Malaysia*

9   *<sup>3</sup>Department of Crop Science, Universiti Putra Malaysia, Serdang, Selangor, Malaysia*

10  
11  
12  
13   \*Corresponding author

14   Email address: [shireenbri@yahoo.com](mailto:shireenbri@yahoo.com) (QSAJ)

15  
16   ¶ These authors contributed equally to this work

17  
18  
19  
20   **Abstract**

21                    Gibberellic acid (GA<sub>3</sub>) phytohormone responsible for bakanae disease development is  
22   well-known and identified. But a number of secondary metabolites along with GA<sub>3</sub>, produced by  
23   the causal pathogen in relation to bakanae symptoms expression were unknown. Therefore, the  
24   aims of this research were to evaluate the symptoms expression analysis of bakanae disease by  
25   pre-seed treatment with pure (synthetic) phytohormones and metabolites in susceptible rice  
26   variety MR 211. The typical bakanae symptoms were evaluated by applying pure GA<sub>3</sub>, FA and  
27   MON either singly or in mixtures. It was confirmed that higher concentration of GA<sub>3</sub> singly or  
28   with higher concentration of GA<sub>3</sub> and MON in mixtures, caused unusual elongation of  
29   internodes. Plants became stunted when high concentration of FA was applied. Browning of  
30   leaves and stems, crown rot, root necrosis occurred and root length was decreased when mixtures  
31   of higher concentration of FA \*MON\*GA<sub>3</sub> were used as pre-treatment. Similar observations  
32   were noted in plants inoculated with *F. proliferatum* at different score levels. The mechanisms of

33 bakanae disease development through different symptoms expression in susceptible variety  
34 infected with *F. proliferatum* were identified.

35

## 36 **Introduction**

37 *Fusarium fujikuroi*, causal agent of bakanae disease is known to produce gibberellic acid  
38 (GA<sub>3</sub>), fumonisin (FB1), moniliformin (MON), fusaric acid (FA) and beauvericin (BEA) in  
39 diseased plant [1- 4]. GA<sub>3</sub> is a growth promoting phytohormone but abnormal production of GA<sub>3</sub>  
40 has been identified as a break-through in disease development and disease resistance or  
41 susceptibility in plants [5]. In addition, GA<sub>3</sub> has been identified as being responsible for increase  
42 in plant height, whereas FA is responsible for decrease in plant height. Fungal metabolites MON,  
43 FB1 and BEA have been identified for causing phytotoxicity in plants rather than establishment  
44 of pathogenicity or disease symptoms expression in bakanae diseased plants [1, 6-7]. Besides  
45 *Fusarium fujikuroi*, *Fusarium proliferatum* is also identified as a causal agent of bakanae disease  
46 [8] and GA<sub>3</sub>, FB1, MON, FA were also isolated from bakanae diseased plants infected with *F.*  
47 *proliferatum* [ 9]. It was also assumed that GA<sub>3</sub>, MON and FA had strong influence on bakanae  
48 symptoms expression as a significant amounts of GA<sub>3</sub>, MON and FA were isolated from the  
49 infected susceptible variety (data not presented here). Therefore, this study was carried out to  
50 verify the role of GA<sub>3</sub>, MON and FA on bakanae symptoms expression, following exogenous  
51 pre-treatment on seeds of susceptible variety MR 211 instead of inoculation with *F. proliferatum*  
52 over time.

53

54

## 55 **Materials and methods**

56

57 ***Soil mixture***

58 Sand 40%, clay 30% and peat (PEATGRO) 30% were mixed well and sterilized at 120  
59 °C for 90 min. Trays (28 cm x 21 cm x 6.5 cm) were filled with 2 kg of the sterilized soil  
60 mixture and used for sowing pre-germinated seeds.

61 ***Chemicals used***

62 Pure (Synthetic) GA<sub>3</sub>, FA, and MON were used in this study. These chemicals were  
63 chosen based on positive relationship that were observed in relation to bakanae symptoms  
64 expression in susceptible variety MR 211 (data not presented here). Two concentrations of each  
65 chemical (GA<sub>3</sub>=15 µg/g, GA<sub>3</sub>=10 µg/g, FA= 400 µg/g, FA= 100 µg/g, MON= 120 ng/g, MON=  
66 80 ng/g) were used in this study. The pure chemicals GA<sub>3</sub>, FA, and MON were purchased from  
67 Sigma-Aldrich.

68  
69 ***Experimental layout and design***

70 Pre-germinated seeds (soaked in water for 48 h) of susceptible variety MR 211 were  
71 soaked for 12 h in the probation hormone (GA<sub>3</sub>) and metabolite (FA and MON) solutions at two  
72 concentrations singly to find out the effective concentration suitable for causing infection or  
73 symptoms expression. This moderate pre-treatment period (12 h) was chosen in order to avoid  
74 the toxicity caused by the metabolites FA and MON treatment over prolonged periods at higher  
75 concentration used and to avoid death of plants at the very early stages of application <sup>6, 10, 11</sup>. The  
76 two concentrations of each treatment were determined based on the highest and the lowest  
77 concentrations derived from bakanae diseased plants (data not presented here). The pre-treated  
78 seeds were sown in the sterilized soil in trays. Untreated pre-germinated seeds and pre-  
79 germinated seeds inoculated with *F. proliferatum* (10<sup>6</sup> conidia/mL) used as controls were sown

80 at the same time as phytohormone and metabolite pre-treated seeds. Seeds were sown in two  
81 rows per tray with 15 seeds per row. A total of 8 treatments along with 2 controls were used in  
82 this experiment. Each tray represented a single replication and trays were arranged in a  
83 completely randomized design with 3 replications per treatment (30 seeds per replication). All  
84 plants were maintained in a glasshouse with day and night temperatures of 30–35 °C and 23–30  
85 °C, respectively, and watered daily. No fertilizer was applied to avoid any effects on the  
86 phytohormone and metabolites.

87  
88  
89 After the single pre-treatment trial, mixtures with two pre-treatment combinations and mixtures  
90 with three pre-treatment combinations were employed to observe the symptoms expression in  
91 mixtures with different treatment combinations. All procedures used were the same as in the  
92 single pre-treatment trial. Development of symptoms associated with the pre-treatments, either  
93 singly or in mixtures with two and three pre-treatment combinations was recorded weekly for 3  
94 weeks.

95

### 96 ***Sampling procedure and data collection***

97 Plants were uprooted carefully without damaging the root tissues at the different  
98 sampling times. Sampling times were determined based on disease score levels as follows: level  
99 1 (7 days after pre-treatment), level 3 (14 days after pre-treatment) and level 5 (21 days after  
100 pre-treatment). The stems, leaves (uppermost second leaf) and roots were separated, and stem  
101 and leaf lengths were measured using a measuring scale (1 m).

102

103 Roots were washed with water to remove soil and root length was recorded using the Root  
104 Scanner (Winrhizo V700, 2012b). Data expressed as percentage (%) increase or decrease in stem  
105 height and root length over the untreated control at each sampling time was analyzed (10 plants  
106 per replicate).

107

108 ***Effects of pre-treatment with GA<sub>3</sub>, FA, and MON on stem cell elongation (Histopathological***  
109 ***study)***

110

111 Random samples of stem sections from plants pre-treated singly with GA<sub>3</sub> (15 mg/L), FA  
112 (400 mg/L), and MON (120 µg/L), in mixtures with GA<sub>3</sub> (15 mg/L) \* FA (400 mg/L)\* MON  
113 (120 µg/L), the untreated control and the diseased control were observed after 14 days of pre-  
114 treatment applied. Plants showing typical symptoms of bakanae disease in relation to disease  
115 score level 1 and 3 were collected and studied. Stems were cut into 1 cm sections and prepared  
116 for scanning electron microscope analysis. Average cell lengths in the longitudinal stem sections  
117 of the plants grown from pre-treated seeds and inoculated plants were compared with those in the  
118 untreated control plants. Average cell length was measured from 30 randomly selected cells from  
119 3 sets of samples (10 cells/sample set) observed under SEM.

120

121 ***Analysis of symptoms expression in plants pre-treated with pure GA<sub>3</sub>, FA and MON applied***  
122 ***singly or in mixtures***

123

124 Symptoms expression were analysed in plants pre-treated with pure GA<sub>3</sub>, FA, and MON  
125 at two concentrations applied singly and in mixtures with two and three treatment combinations  
126 at stipulated disease scoring levels (score 1, 3 and 5) on percent increase or decrease basis in  
127 comparison with diseased control plants. Data were analysed using SAS software (Version 9.2).

128

## 129 **Results**

130

### 131 *Effects of GA<sub>3</sub>, FA and MON applied singly*

132

133 Both GA<sub>3</sub> concentrations increased stem height, whereas the other pre-treatments  
134 decreased stem height after 7 days of pre-treatment. Highest stem height decrease was observed  
135 in pre-treatment FA (400 mg/L) after 7 days of pre-treatment. It was also observed that the  
136 increasing trend in stem height in GA<sub>3</sub> pre-treatment declined after 7 days to after 21 days. In  
137 contrast, pre-treatment with MON (120 µg/L) showed increasing stem height after 14 days of  
138 pre-treatment and was found to continue increasing after 21 days which was similar to pre-  
139 treatment with GA<sub>3</sub> (15 mg/L). Percent decrease in stem height declined in pre-treatment with  
140 FA (400 mg/L) over time. Stem height increase/decrease following the treatment used were  
141 observed in Figure 1.

142

143 **Figure 1.** Stem height increase or decrease in plants following pre-seed treatment with GA<sub>3</sub>, FA,  
144 and MON singly in comparison with disease free (control) and disease control (inoculated)  
145 plants after 14 days.

146

147 These results were further confirmed by the histopathological study comparing cell lengths  
148 elongation with the different treatments. Stem cell length (average) was elongated (61.33 µm) in  
149 plants pre-treated with higher concentration of GA<sub>3</sub> and was comparable to average stem cell  
150 length in diseased control plants (63.47 µm) after 14 days of pre-treatment and inoculation,  
151 respectively (Figure 2 a and b). Average cell length of stems was elongated somewhat (47.6 µm)  
152 when pre-treated with higher concentration of MON compared to average stem cell length of  
153 healthy control plants (45.33 µm) after 14 days (Figure 2 c and d).

154 In contrast, pre-treatment with FA showed stunting in stem height, which may be due to the  
155 shorter stem cell length. This percentage decrease in stem height observed was probably due to  
156 the higher cell division that occurred in plants at disease score 1, which caused shorter cell

157 length (40  $\mu\text{m}$ ) in stems as compared to the stem cell length of healthy control plants (45.33  $\mu\text{m}$ )  
158 observed in the histopathological study (Figure 2 e and d). From these result, it was evident that  
159 higher concentrations of GA<sub>3</sub> and FA were responsible for the stem height increase and decrease,  
160 respectively, whereas the higher concentration of MON was responsible for marginal stem height  
161 increase after 14 days and onwards.

162  
163 ***Effects of GA<sub>3</sub>, FA and MON applied in combinations***  
164

165 In mixtures with two treatment combinations, seeds pre-treated with GA<sub>3</sub> (15 mg/L)\* MON (120  
166  $\mu\text{g/L}$ ) resulted in the highest (%) increase in stem height after 7 -14 days and was found to the  
167 next to the diseased control plants. All combinations with GA<sub>3</sub> and MON increased stem height  
168 after 14 days. Therefore, it was apparent that both GA<sub>3</sub> and MON had a synergistic effect on  
169 stem height increase. Thus, at the disease score level 3, stem height was increased after 14 days,  
170 and this increasing trend was observed in pre-treatment combination treatments with GA<sub>3</sub> (15  
171 mg/L)\* MON (120  $\mu\text{g/L}$ ). In contrast, there might be an antagonistic response between FA and  
172 GA<sub>3</sub> and stem height increase or decrease was observed in relation to higher concentration of  
173 involvement with GA<sub>3</sub> or FA vice versa. Stem height increase in plants of pre-treated seeds with  
174 GA<sub>3</sub> (10 mg/L)\* FA (400 mg/L) and in inoculated plants (diseased control) were observed to be  
175 almost similar after 7days. Thus, stunting observed in plants after 7 days of inoculation might be  
176 due to the effect of higher concentration of FA present in plants at the disease score level 1 (after  
177 7 days of inoculation).

178  
179 The mixtures with three pre-treatment combinations of FA (400 mg/L)\* MON (80  $\mu\text{g/L}$ )\* GA<sub>3</sub>  
180 (15 mg/L) and FA (100 mg/L)\* MON (120  $\mu\text{g/L}$ )\* GA<sub>3</sub> (15 mg/L) increased stem height after 7

181 days. This is largely due to the effect of GA<sub>3</sub> (15 mg/L) singly as the treatment increased stem  
182 height early at 7 days after pre-treatment. Although stem cell length was observed to be  
183 shortened in this pre-treatment compared to control plants (Figure 2 f and d) but stem height  
184 increase after 14 days in this pre-treatment was attributed to the effect of excessive cell divisions  
185 in this pre-treatment.

186  
187

188 **Figure 2: SEM micrograph of stem cell length in GA<sub>3</sub> (15 mg/L), FA (400 mg/L) and MON**  
189 **(120 µg/L) pre-treated plants singly or in combination in comparison with diseased and**  
190 **healthy control plants. [GA<sub>3</sub> pre-treated stem cells (a), Stem cells of diseased control plants**  
191 **(b), MON pre-treated stem cell (c), Stem cells of healthy control plants (d), FA pre-treated**  
192 **stem cell (e) and Stem cells in mixtures of pre-treatment with GA<sub>3</sub> (15 mg/L)\* FA (400**  
193 **mg/L)\* MON (120 µg/L) (f)]**

194

195 Along with increases in stem height, leaf browning, stem browning, crown rot and root necrosis  
196 were observed in plants pre-treated with MON at both concentrations after 21 days. Browning  
197 was found to be more prominent at the lower concentration of MON (80 µg/L) applied singly as  
198 pre-treatment, whereas crown rot and root necrosis were more prominent at the higher  
199 concentration of MON (120 µg/L) (**Figure 3**). The browning symptoms observed in leaves and  
200 stems were similar to the symptoms on plants infected with *F. proliferatum* (diseased control),  
201 and could easily be distinguished from the symptoms on untreated control (healthy) plants  
202 (**Figure 3**).

203 **Figure 3: Plants pre-treated with MON singly and diseased control plants showing leaf**  
204 **browning, stem browning, crown rot and root necrosis in comparison with untreated**  
205 **(healthy) control plants after 21 days.**

206

207 The highest decrease in root length was observed after 7 days, while it was found to increase  
208 after 14 days in all pre-treatments along with the diseased control. The highest decrease in root  
209 length was observed in pre-treatment with GA<sub>3</sub> (15 mg/L) followed by the diseased control and



210 GA<sub>3</sub> after 7 days. Both concentrations of MON increased root length after 21 days of pre-  
211 treatment but with necrotic lesions.

212

213 In mixtures with two pre-treatment combinations the highest root length increase was observed  
214 in mixtures with GA<sub>3</sub> (15 mg/L)\* MON (120 µg/L) after 14 days (Figure 4a). It was also  
215 observed that both concentrations of MON caused crown rot and root necrosis in mixtures with  
216 GA<sub>3</sub> in plants pre-treated with two pre-treatment combinations (Figure 5 a). It was also apparent  
217 that MON in mixtures either with GA<sub>3</sub> or with FA caused prominent crown rot and root necrosis  
218 compared to that in mixtures with FA and GA<sub>3</sub> (Figure 4 b and c).

219

220 **Figure 4: Plant roots showing different architectures when seeds were pre-treated with two**  
221 **treatment mixtures. [mixtures with MON and GA<sub>3</sub> (a) and mixtures with FA and GA<sub>3</sub> and**  
222 **mixtures with FA and MON (b)] \*G1= GA<sub>3</sub> (10 mg/L), G2= GA<sub>3</sub> (15 mg/L), F1= FA (100 mg/L), F2=**  
223 **FA (400 mg/L), M1= MON (80 µg/L), M2= MON (120 µg/L)]. \*MON = moniliformtn, GA<sub>3</sub> = gibberellic**  
224 **acid, FA= fusaric acid**

225

226

227 Crown rot and root necrosis was also observed to be severe in mixtures with three pre-treatment  
228 combinations in GA<sub>3</sub> (15 mg/L)\* MON (120 µg/L)\* FA (400 mg/L) (Figure 5).

229

230 **Figure 5. Crown rot and root necrosis due to the effect of MON in mixtures with three pre-**  
231 **treatment combinations. {\*G1= GA<sub>3</sub> (10 mg/L), G2= GA<sub>3</sub> (15 mg/L), F1= FA (100 mg/L), F2= FA (400**  
232 **mg/L), M1= MON (80 µg/L), M2= MON (120 µg/L)}. \*MON = moniliformtn, GA<sub>3</sub> = gibberellic acid,**  
233 **FA = fusaric acid**

234

235 From the scenario in pre-treatments, either singly or in mixtures, it was observed that higher  
236 concentrations of GA<sub>3</sub> and MON had a direct influence on increase in stem height. In contrast,

237 FA singly in any concentration or at higher concentrations in mixtures with GA<sub>3</sub> and MON  
238 decreased stem height.

239

## 240 **Discussion**

241

242 Stem height increase in bakanae diseased plants at the disease score level of 3 (14 days  
243 after inoculation) was found to be dependent on higher amount of GA<sub>3</sub> singly or in mixtures with  
244 MON. Although stem height increase (%) was observed to be lower in pre-treatment GA<sub>3</sub> (15  
245 mg/L)\* MON (120 µg/L) compared to diseased control plants after 14 days but it was presumed  
246 to be due to slow down of GA<sub>3</sub> activity with time. Moreover, increase in GA<sub>3</sub> concentration was  
247 initiated in the diseased control plants after 7 days of pathogen inoculation and reached a  
248 maximum concentration in infected plants after 14 days, whereas pre-treatment with GA<sub>3</sub>  
249 responded with a maximum level after 7 days. Similar observations were reported by other  
250 researchers, where GA<sub>3</sub> concentration was increased to its highest level in plants after 1 week of  
251 application and subsequently decreased with time [12].

252

253 In contrast, pre-treatment with higher concentrations of FA singly or in mixtures with MON  
254 decreased stem height after 7 days and was reflected in bakanae diseased plants where stunting  
255 was observed at the disease score level of 1 after 7 days of inoculation. At the disease score level  
256 of 5, stem heights were found to decrease to some extent probably due to the effect of GA<sub>3</sub>. A  
257 possible explanation for this was that the increasing rate of GA<sub>3</sub> was slowed down and FA was  
258 increased significantly due to antagonistic effect with each other with time in infected plants as  
259 observed after 21 days of pre-treatment. This is the first report that complex bakanae symptoms

260 associated with the combination effect of increased GA<sub>3</sub> levels along with metabolites FA and  
261 MON produced by the pathogen in infected plants, rather than solely dependent on increased  
262 levels of GA<sub>3</sub> in infected plants. bakanae symptoms expression due to phytohormonal and  
263 metabolites effect is as illustrated in the Figure 6.

264

265 Stem height increase (%) was reliant on elongation of cell length as well as an increase in cell  
266 division inside the plant tissues as observed by several researchers. Other researchers reported  
267 that cell division was mainly influenced by GA<sub>3</sub> application compared to cell elongation <sup>11</sup>. The  
268 authors assumed that IAA might have an influence on plant height increase after cell division  
269 occurred with GA<sub>3</sub> application. Later, other researchers explained that GA<sub>3</sub> pre-treated plants  
270 stimulated IAA synthesis in plant cells first and IAA had an effect on cell elongation and this cell  
271 elongation was increased in aged tissues compared to young tissues [14-15].

272

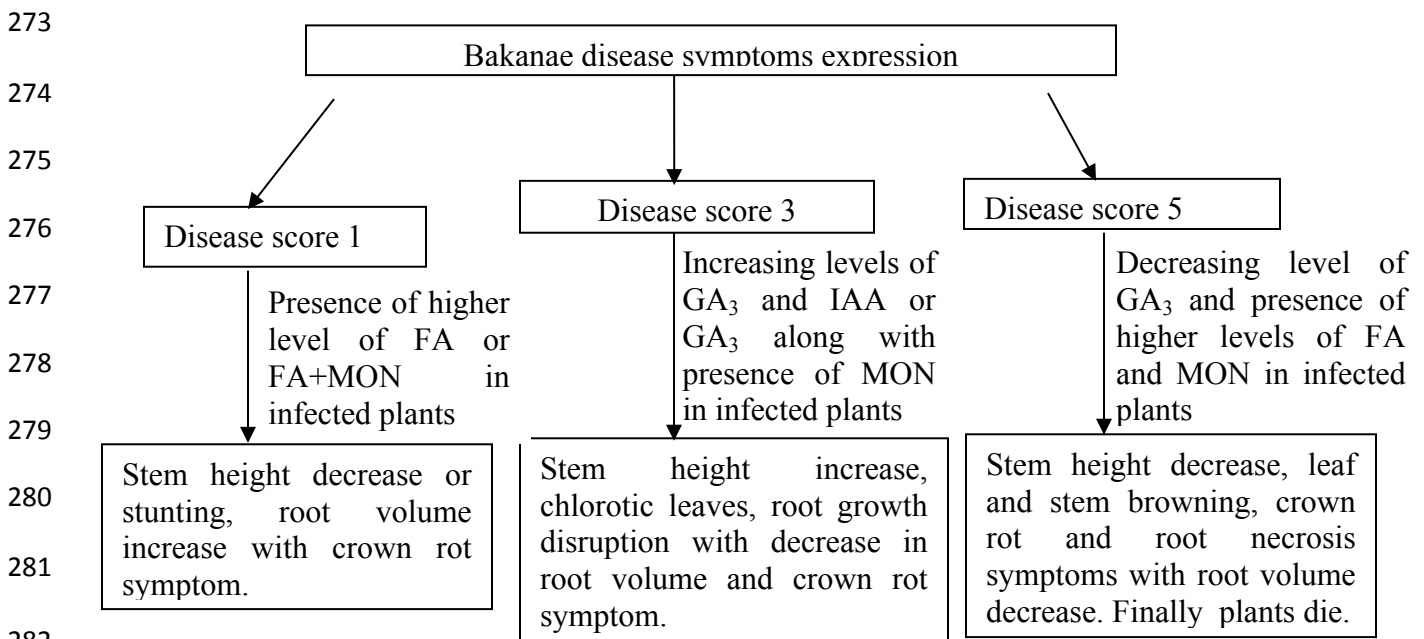

283 **Figure 6: Flowchart of Bakanae symptoms expression due to phytohormonal**

284 **and metabolites effect** (GA<sub>3</sub>= gibberellic acid, IAA= indole acetic acid, FA=  
285 fusaric acid, MON= moniliformin).

286  
287

288 Thus, the increase in stem height in bakanae diseased plants was due to the combined effect of  
289 cell division and cell length elongation. The mechanism is similar as observed in infected plants  
290 with *F. proliferatum* which induced cell division first due to increase levels of GA<sub>3</sub> and thereby  
291 stimulated IAA production in infected plants. Thus, IAA in infected plants influenced cell  
292 enlargement in bakanae diseased plants. It was also established that IAA levels increased in  
293 bakanae diseased plants infected with *F. proliferatum* when GA<sub>3</sub> was increased [9]. Several  
294 researchers have also supported that GA<sub>3</sub> and IAA play their role synergistically in plants [15-  
295 17]. This higher level of GA<sub>3</sub> along with increased IAA levels at the disease score level of 3,  
296 caused stem height increase compared to control plants after 14 days of inoculation. Although  
297 some stem height increase and cell enlargement was observed in MON pre-treated stem cells, but  
298 this response in relation to IAA increase has not been reported yet.

299

300 In the three pre-treatment combination FA (400 mg/L)\* MON (120 µg/L)\* GA<sub>3</sub> (15 mg/L) stem  
301 height was increased (after 14 days) although shorter stem cell length (36.53 µm) was observed  
302 compared to the control (45.33 µm) in the histopathological study. The shorter cell length in this  
303 three pre-treatments mixture was probably due to an increase in cell division as a result of FA  
304 (400 mg/L) and/or GA<sub>3</sub> (15 mg/L) and observed in the histopathological study after 14 days of  
305 inoculation. Moreover, it was reported that IAA was increased in plants at the second week after  
306 GA<sub>3</sub> application <sup>10</sup>, and that the increased IAA was reflected by a higher increase in stem height  
307 after 14 days with pre-treatment FA (400 mg/L)\* MON (120 µg/L)\* GA<sub>3</sub> (15 mg/L). Again the  
308 shorter stem cell length (36.53 µm) was the average of 30 randomly selected stem cells pre-

309 treated with FA (400 mg/L)\* MON (120 µg/L)\* GA<sub>3</sub> (15 mg/L). Although some stem cells were  
310 initiated to elongate in this pre-treatment as observed in Figure 5.2e whereas, others were in  
311 initial stage of elongation and did not reflect individual cell enlargement in histopathological  
312 study where measurement was on average cell length. Additionally, stem height increase was  
313 slowed down after 7 days due to antagonistic effect of higher concentration of FA with GA<sub>3</sub> and  
314 after 14 days stem height increased due to the effect of higher concentration of MON and GA<sub>3</sub>  
315 combination.

316

317 In contrast, plant height stunting was found to be mainly due to the effect of FA rather than GA<sub>3</sub>.  
318 This observation is supported by other researchers as well. Other researcher reported that plant  
319 stunting or rosetting occurred due to low concentration of GA<sub>3</sub> in plants <sup>16</sup>. It was also observed  
320 that high levels of FA accumulation in plants resulted in stunted plant height and decreased **root**  
321 length in tomato [7, 19-20]. The lower amount of GA<sub>3</sub> (8.9 µg/g fresh wt.) as determined in the  
322 disease score level of 1 resulted in stunting of plants after 7 days of pre-treatment. Although  
323 metabolic activity was not determined in this experiment but other researchers reported that the  
324 stunting mechanism is mainly due to changes in metabolic activity in plants, including speeding  
325 up of the lipid peroxide activity, inhibition of ATP synthesis or decreased ATP levels [6, 19-20].  
326 compared to control plants. Moreover, higher concentrations of FA and MON also resulted in  
327 plant height reduction as was observed in jimsonweed plants when pure FA and MON were  
328 applied <sup>7</sup>. Thus, lower amount of GA<sub>3</sub> and/or in mixtures with higher amounts of FA and MON  
329 contributed to the cessation and collapse of plants growth at the disease score level of 5 that was  
330 observed after 21 days of pre-treatment.

331

332 Crown rot and root necrosis due to higher concentration of MON in infected plants at later  
333 growth stages were observed. Similar symptoms have also been observed by other researchers in  
334 different plant species [7, 21]. Brown to pink discoloration of leaves at a disease score level of 5  
335 may be due to higher concentration of MON present in plants infected by *Fusarium*  
336 *proliferatum*. It was also observed pink ear rot in maize when a higher concentration of MON  
337 was associated with the ear rot causal pathogen *Fusarium suubgltinans* [22]. In addition, earlier  
338 researcher reported that MON had toxic effects with growth reductions of coleoptiles as well as  
339 vein chlorosis and necrosis in corn and tobacco callus <sup>19</sup>. MON was also found to cause  
340 cytoplasmic disruptions and abnormal mitosis that resulted in “a disruption of the spindle  
341 apparatus” in infected plant cells <sup>19, 21</sup>. In contrast, reported that browning of stalk, leaf, and ear  
342 of rice was due to the effect of fumonisin B1 when inoculated with *F. proliferatum* <sup>22</sup>. However,  
343 the authors did not isolate other mycotoxins produced by the fungus in the rice plants infected  
344 with *F. proliferatum* nor compared the symptoms treated with pure fumonisin B1. More recently  
345 provided evidence that FB1 had no pathogenicity effects on bakanae symptoms development <sup>1</sup>.  
346 The browning or pinkish symptom associated with a disease score 5 was evaluated by applying  
347 pure MON to germinating seeds of susceptible variety MR 211, and similar symptoms were  
348 observed as in plants inoculated with *F. proliferatum*. Therefore, it was confirmed that browning  
349 and pinkish discoloration of leaves and stems as well as crown rot and root necrosis were  
350 associated with MON effect. Higher concentration of FA, MON and less GA<sub>3</sub> accumulation in  
351 infected plants resulted in dead plants over time at a disease score level of 5, and this was  
352 attributed to inhibition of photosynthesis and toxic effects of MON and FA in plant cells.

353

354

## 355 References

- 356 1. Cruz A, Marin P, González-Jaén M T, Aguilar KG, Cumagun CJR. Phylogenetic  
357 analysis, fumonisin production and pathogenicity of *Fusarium fujikuroi* strains isolated  
358 from rice in the Philippines. *Jl of Sci Food and Agril.* 2013; 93: 3032-3039.
- 359 2. Zainudin NAIM, Razak AA, Salleh B. Secondary metabolite profiles and mating  
360 populations of *Fusarium* species in section *Liseola* associated with bakanae disease of  
361 rice. *Malay J of Microbiol.* 2008; 4(1): 6-13.
- 362 3. Glenn AE. Mycotoxigenic *Fusarium* species in animal feed. *Animal Feed Sci and*  
363 *Technol.* 2007; 137: 213–240.
- 364 4. Desjardins AE, Manandhar HK, Plattner RD, Anandhar GG, Poling SM, Maragos CM.  
365 *Fusarium* species from Nepalese rice and production of mycotoxins and gibberellic acid  
366 by selected species. *Appl and Environ Microbiol.* 2000; 66(3): 1020–1025.
- 367 5. Bari R, Jones LDG. Role of plant hormones in plant defence responses. *Plant Mole Biol.*  
368 2009; 69:473–488.
- 369 6. Bouizgarne B, El-Maarouf-Bouteau H, Frankart C, Rebutier D, Madiona K, Pennarun  
370 AM, et al. Early physiological responses of *Arabidopsis thaliana* cells to fusaric acid:  
371 toxic and signalling effects. *New Phytologist.* 2006; 169: 209–218.
- 372 7. Abbas HK, Boyette CD, Hoagland RE. "Phytotoxicity of *Fusarium*, other fungal isolates,  
373 and of the phytotoxins fumonisin, fusaric acid, and moniliformin to jimsonweed".  
374 *Phytoprotection.* 1995; 76 (1): 17-25.
- 375 8. Quazi SAJ, Meon S, Jaafar H, Ahmad ZABM. Characterization of *Fusarium*  
376 proliferatum through species specific primers and its virulence on rice seeds. *Int J Agri*  
377 *Biol.* 2013;15:649-56.
- 378 9. Quazi SAJ, Meon S, Jaafar H, Ahmad ZABM. The role of phytohormones in relation to  
379 bakanae disease development and symptoms expression. *Physiol and Mole Plant Pathol.*  
380 2015; 90: 27-38
- 381 10. Pavlovkin J, Mistrík I, Prokop M. Some aspects of the phytotoxic action of fusaric acid  
382 on primary *Ricinus* roots. *Plant, Soil and Environ.* 2004; 50 (9): 397–401.
- 383 11. . Styer, C.H. and Cutler, H.G. (1984). Effects of moniliformin on mitosis in maize (*Zea*  
384 *mays* L.). *Plant and Cell Physiol.* 1996; 25(6): 1077-1082.
- 385 12. Kong L, Abrams SR, Owen SJ, Graham H, Aderkas PV. Phytohormones and their  
386 metabolites during long shoot development in Douglas-fir following cone induction by  
387 gibberellin injection. *Tree Physiol.* 2008; 28: 1357–1364.
- 388 13. Arney SE, Mancinelli P. The basic action of gibberellic acid in elongation of 'meteor'  
389 pea stems. *New Phytologist.* 1965; 65(2): 161-175.
- 390 14. Gray WM, Ostin A, Ran Sandberg G0, Romano CP, Estelle M. High temperature  
391 promotes auxin-mediated hypocotyl elongation in *Arabidopsis*. *Proceedings of the*  
392 *National Academy of Sciences of the United States of the America.* 1998; 95(12): 7197–  
393 7202. Available at : <https://doi.org/10.1073/pnas.95.12.7197>
- 394 15. Kazama H, Katsumi M. Auxin-gibberellin relationships in their effects on hypocotyl  
395 elongation of light-grown cucumber seedlings II. Effect of GA<sub>3</sub>-pretreatment on IAA-  
396 induced elongation. *Plant and Physiol.* 1974; 15: 307-314.
- 397 16. Bhattacharya S, Bhattacharya NC, Malik CP. Synergistic effect of gibberellic acid and  
398 indole-3-acetic acid on rooting in stem cuttings of *Abelmoschus esculentus* Moench.  
399 *Planta.* 1978; 138: 111- 112.

- 400 17. Ockerse R, Galston AW. Gibberellin-Auxin Interaction in pea stem elongation. *Plant*  
401 *Physiol.* 1967; 42: 47-54.
- 402 18. Tanimoto E. Tall or short? Slender or thick? A plant strategy for regulating elongation  
403 growth of roots by low concentrations of gibberellin. *Annals of Bot.* 2012; 10(2): 373-81.  
404 doi: 10.1093/aob/mcs049. Epub 2012 Mar 21.
- 405 19. Diniz SPSS, Oliveira RC. Effects of fusaric acid on *Zea mays* L. seedlings. *Int J of Exp*  
406 *Bot.* 2009; 78: 155-160.
- 407 20. Asch VMAJ, Rijkenberg FHJ, Coutinho TA. Phytotoxicity of fumonisin B1,  
408 moniliformin and T-2 toxin to corn callus culture. *Posthar Pathol and Mycotox.* 1992;  
409 82(11): 1330-1332.
- 410 21. Lew H, Chelkowski J, Pronczuk P, Edinger W. Occurrence of the mycotoxin  
411 moniliformin in maize (*Zea mays* L.) ears infected by *Fusarium subglutinans* (Wollenw.  
412 & Reinking) Nelson *et al.*, *Food Addit and Contamin.* 13(3): 321-324.  
413



bioRxiv preprint doi: <https://doi.org/10.1101/725978>; this version posted August 5, 2019. The copyright holder for this preprint (which was not certified by peer review) is the author/funder, who has granted bioRxiv a license to display the preprint in perpetuity. It is made available under aCC-BY 4.0 International license.

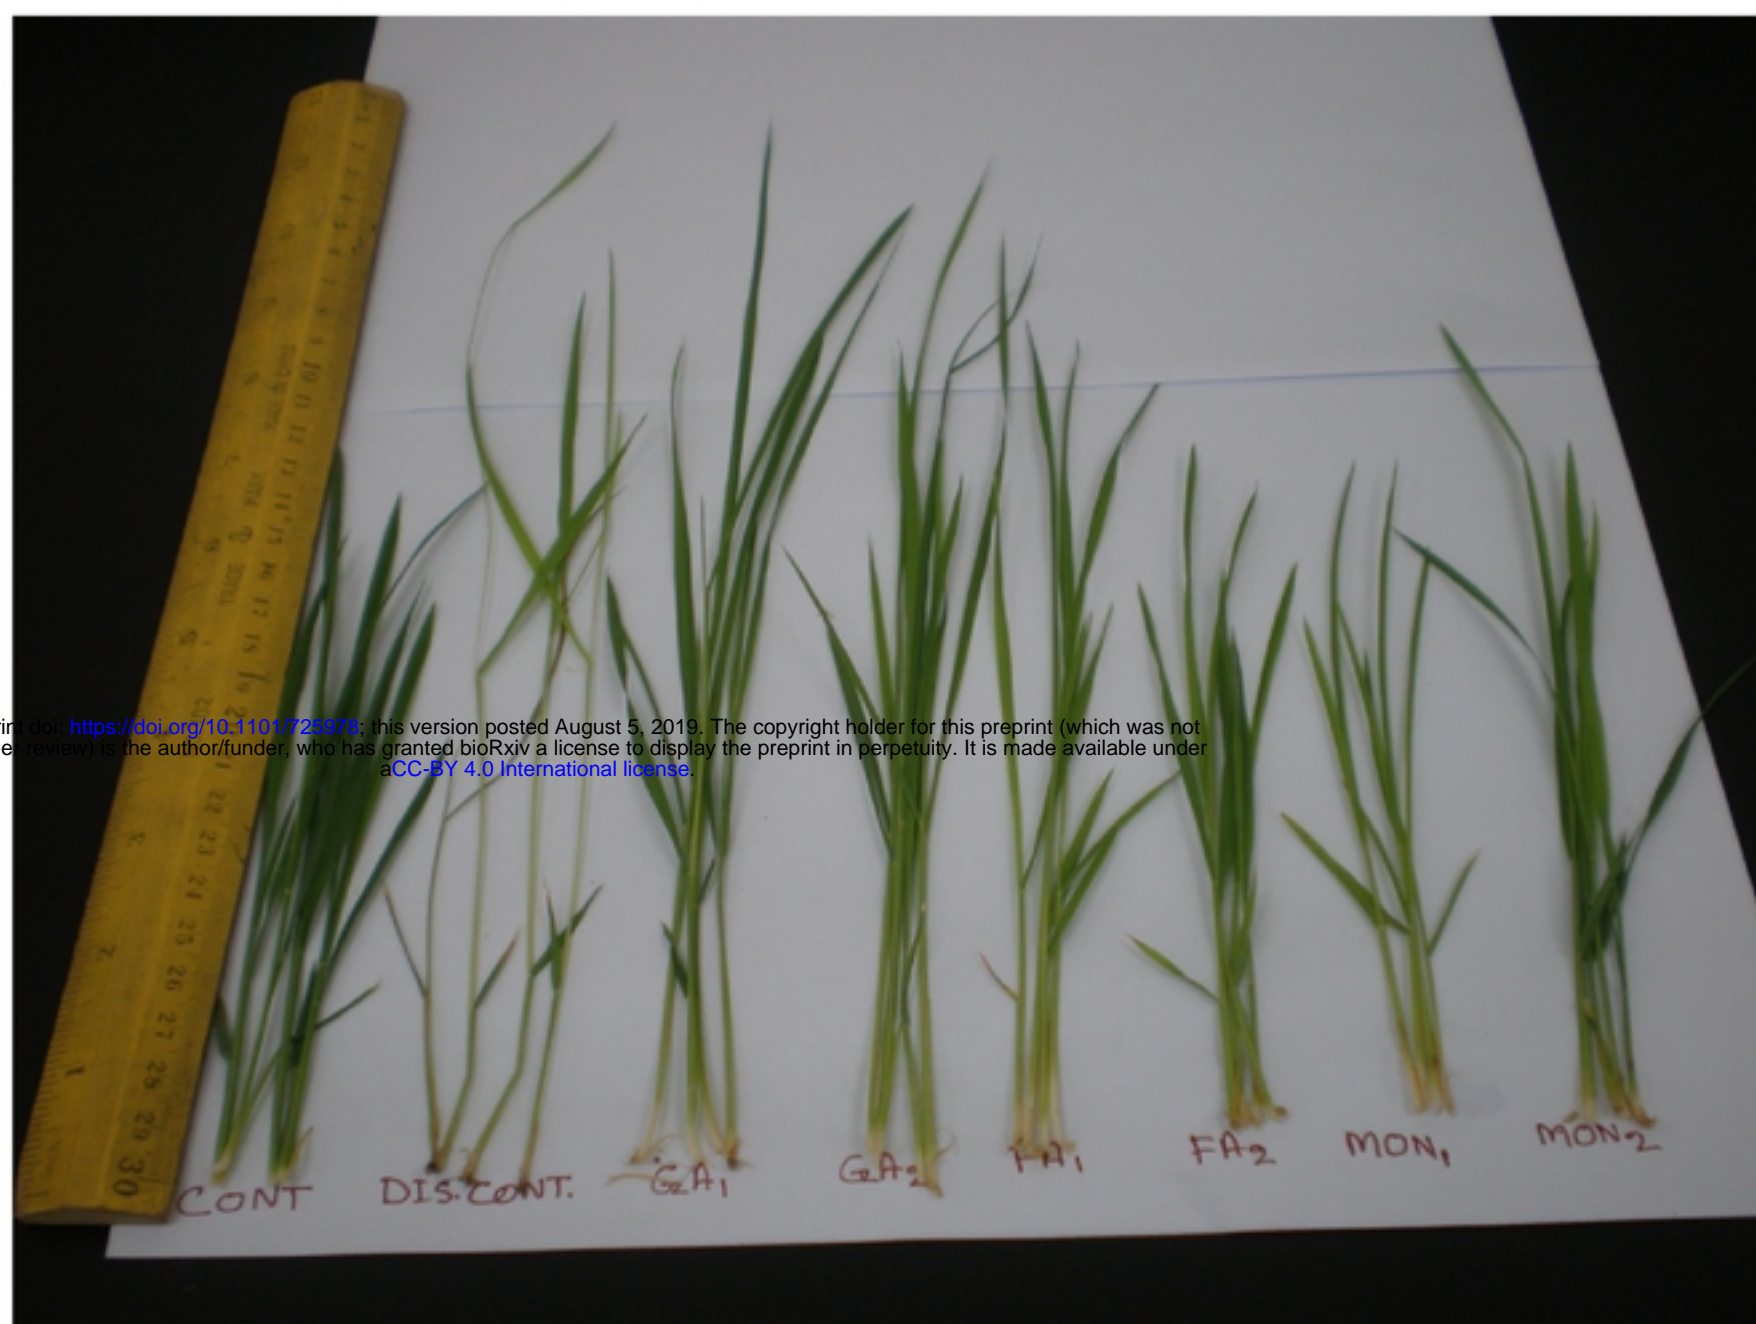

**Figure 1.** Stem height increase or decrease in plants following pre-seed treatment with GA<sub>3</sub>, FA, and MON singly in comparison with disease free (control) and disease control (inoculated) plants after 14 days.



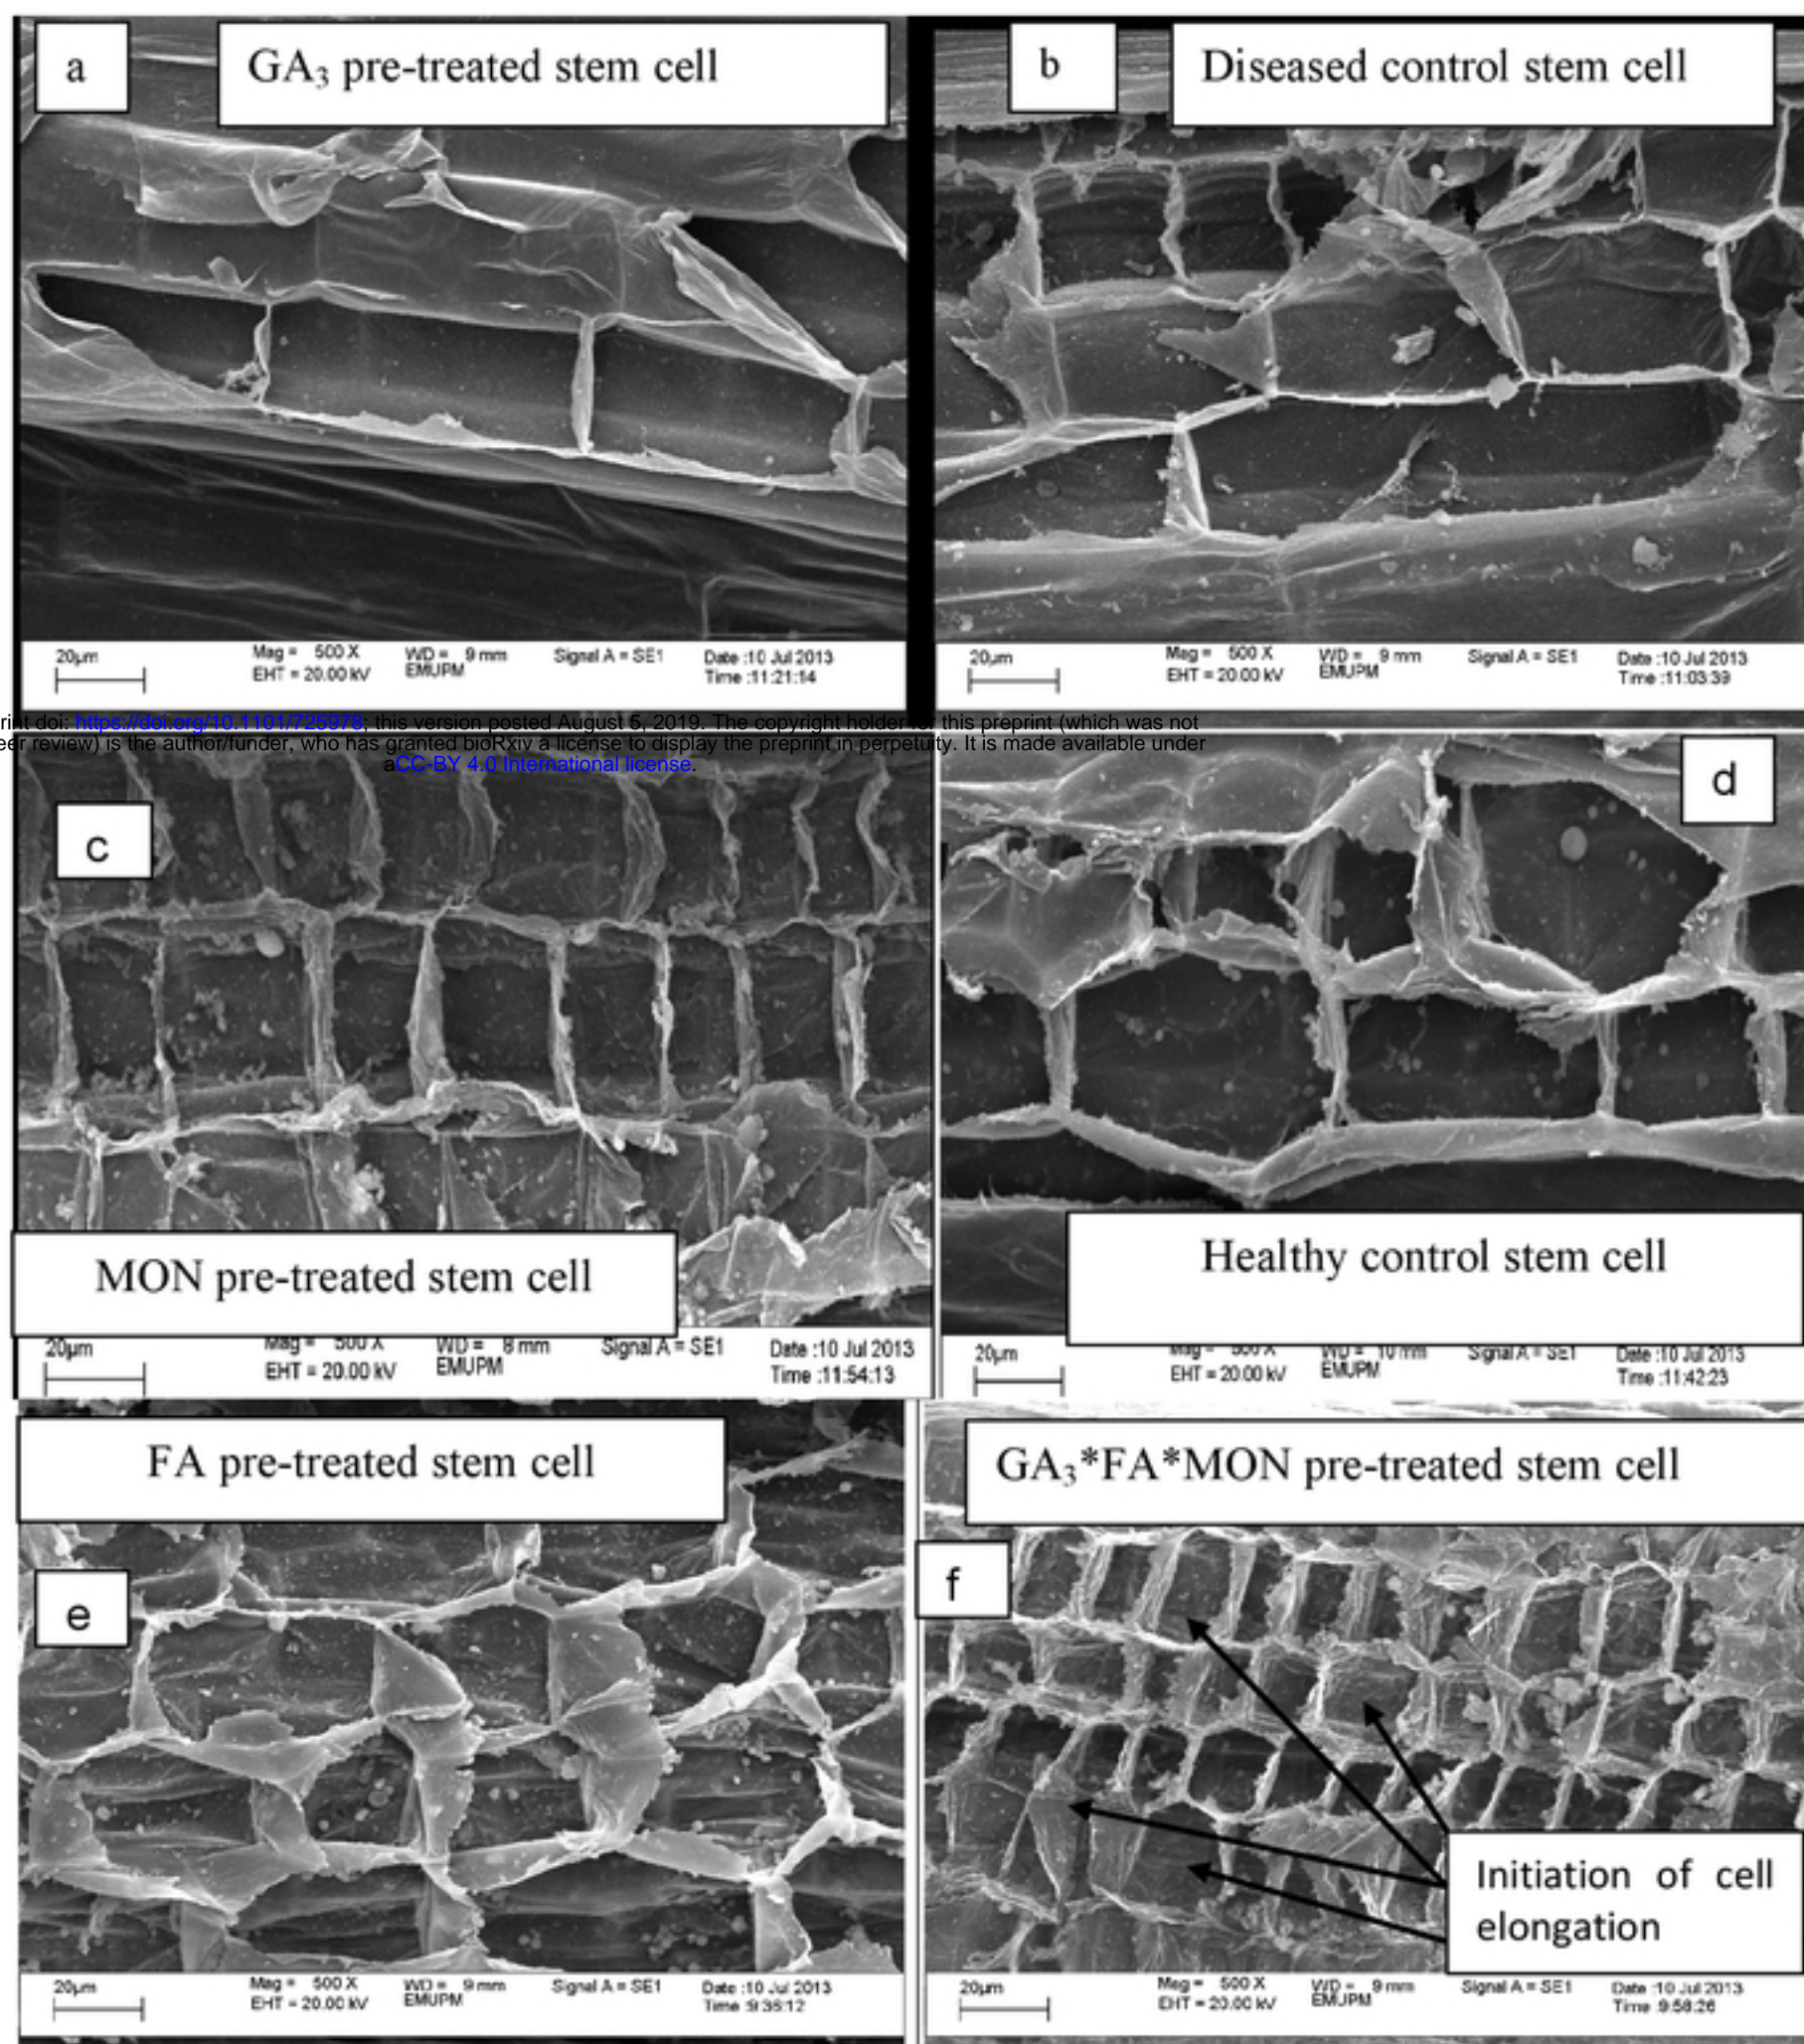

**Figure 2: SEM micrograph of stem cell length in GA<sub>3</sub> (15 mg/L), FA (400 mg/L) and MON (120 µg/L) pre-treated plants singly or in combination in comparison with diseased and healthy control plants. [GA<sub>3</sub> pre-treated stem cells (a), Stem cells of diseased control plants (b), MON pre-treated stem cell (c), Stem cells of healthy control plants (d), FA pre-treated stem cell (e) and Stem cells in mixtures of pre-treatment with GA<sub>3</sub> (15 mg/L)\* FA (400 mg/L)\* MON (120 µg/L) (f)]**



bioRxiv preprint doi: <https://doi.org/10.1101/725978>; this version posted August 5, 2019. The copyright holder for this preprint (which was not certified by peer review) is the author/funder, who has granted bioRxiv a license to display the preprint in perpetuity. It is made available under aCC-BY 4.0 International license.

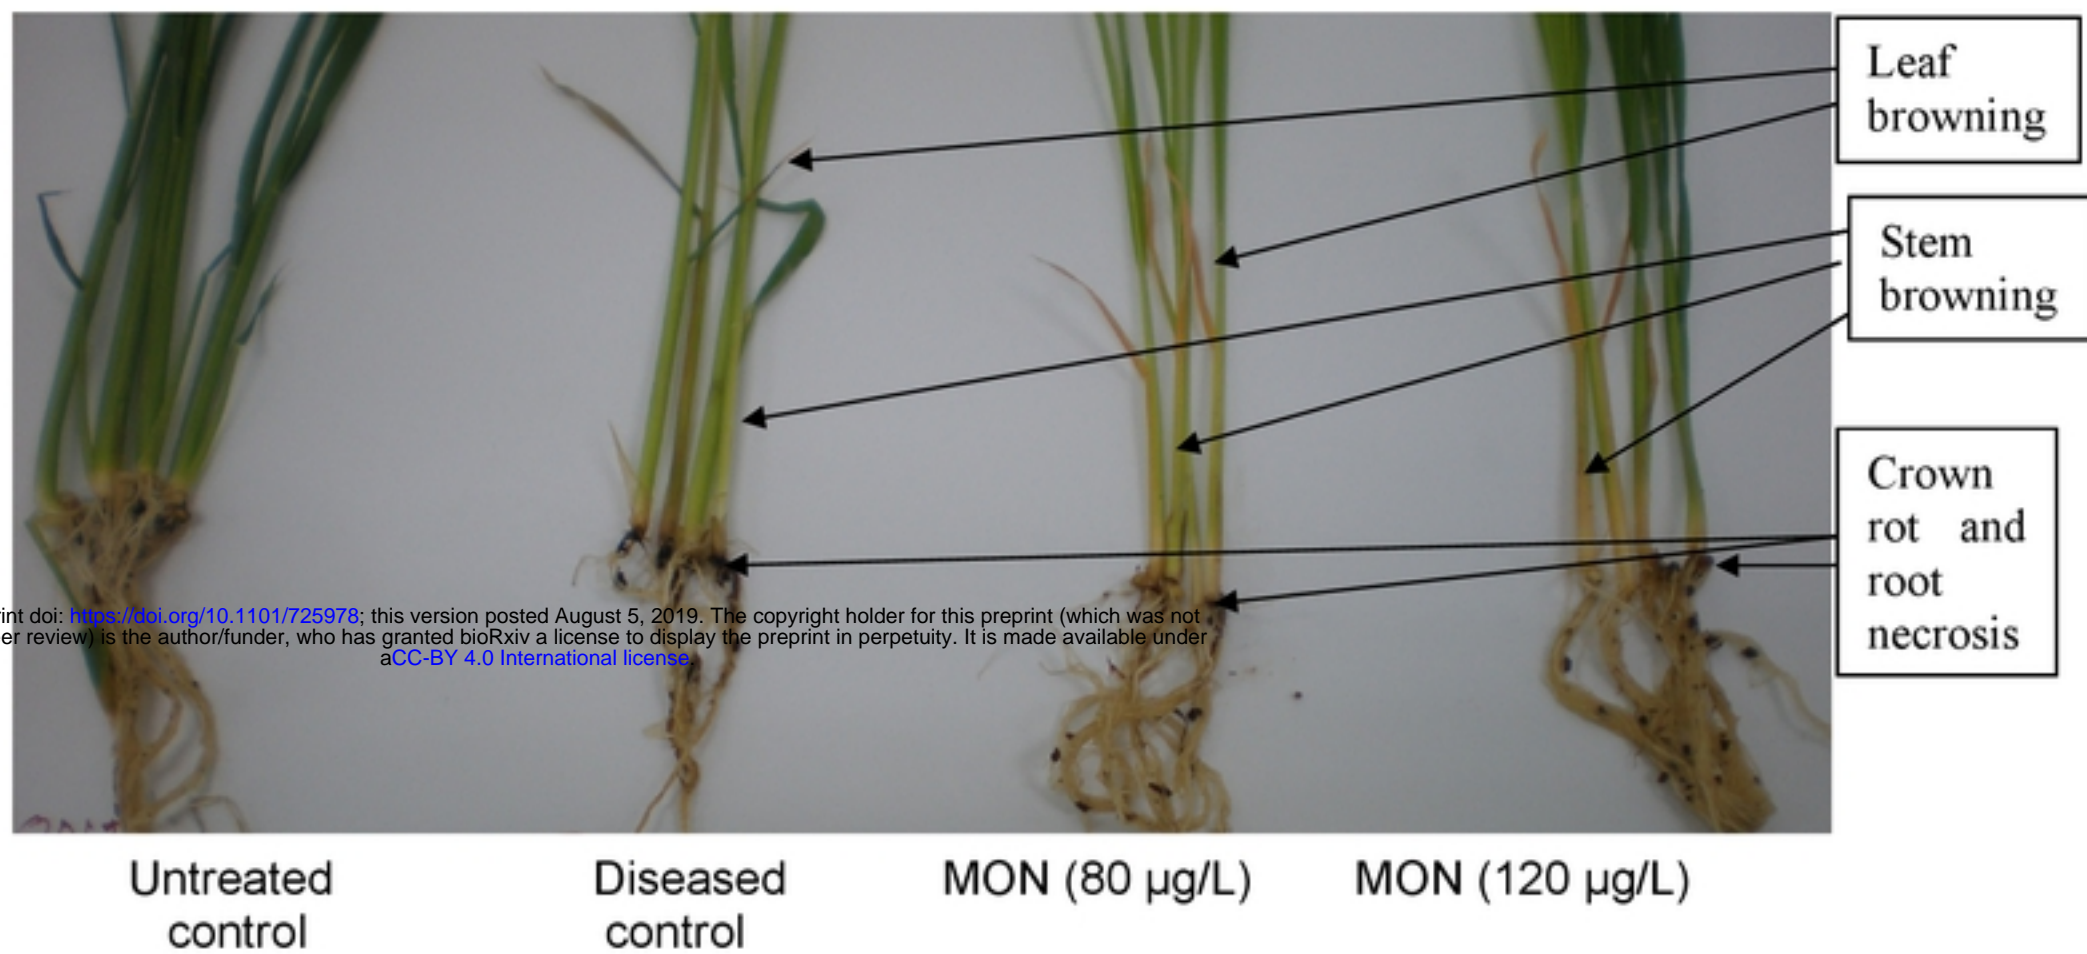

**Figure 3: Plants pre-treated with MON singly and diseased control plants showing leaf browning, stem browning, crown rot and root necrosis in comparison with untreated (healthy) control plants after 21 days.**

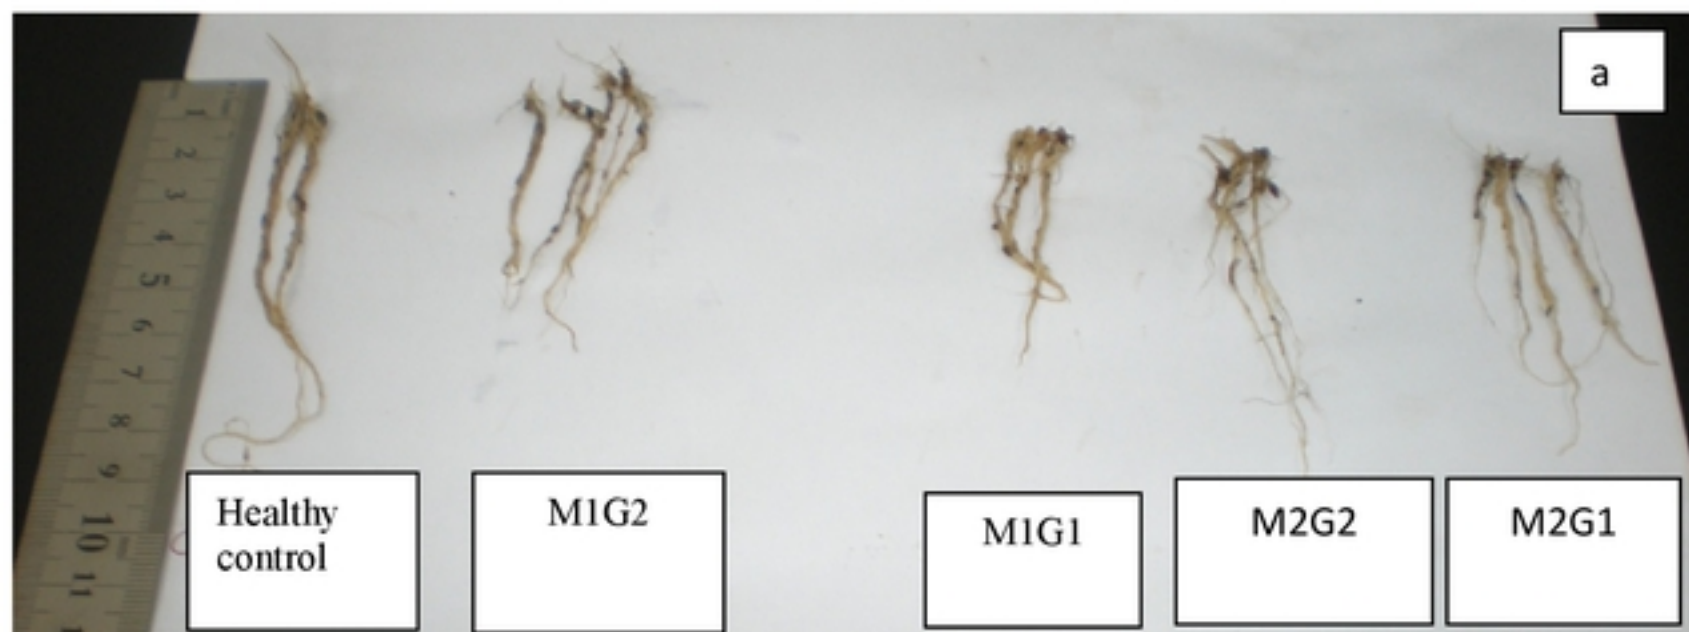

bioRxiv preprint doi: <https://doi.org/10.1101/725978>; this version posted August 5, 2019. The copyright holder for this preprint (which was not certified by peer review) is the author/funder, who has granted bioRxiv a license to display the preprint in perpetuity. It is made available under aCC-BY 4.0 International license.

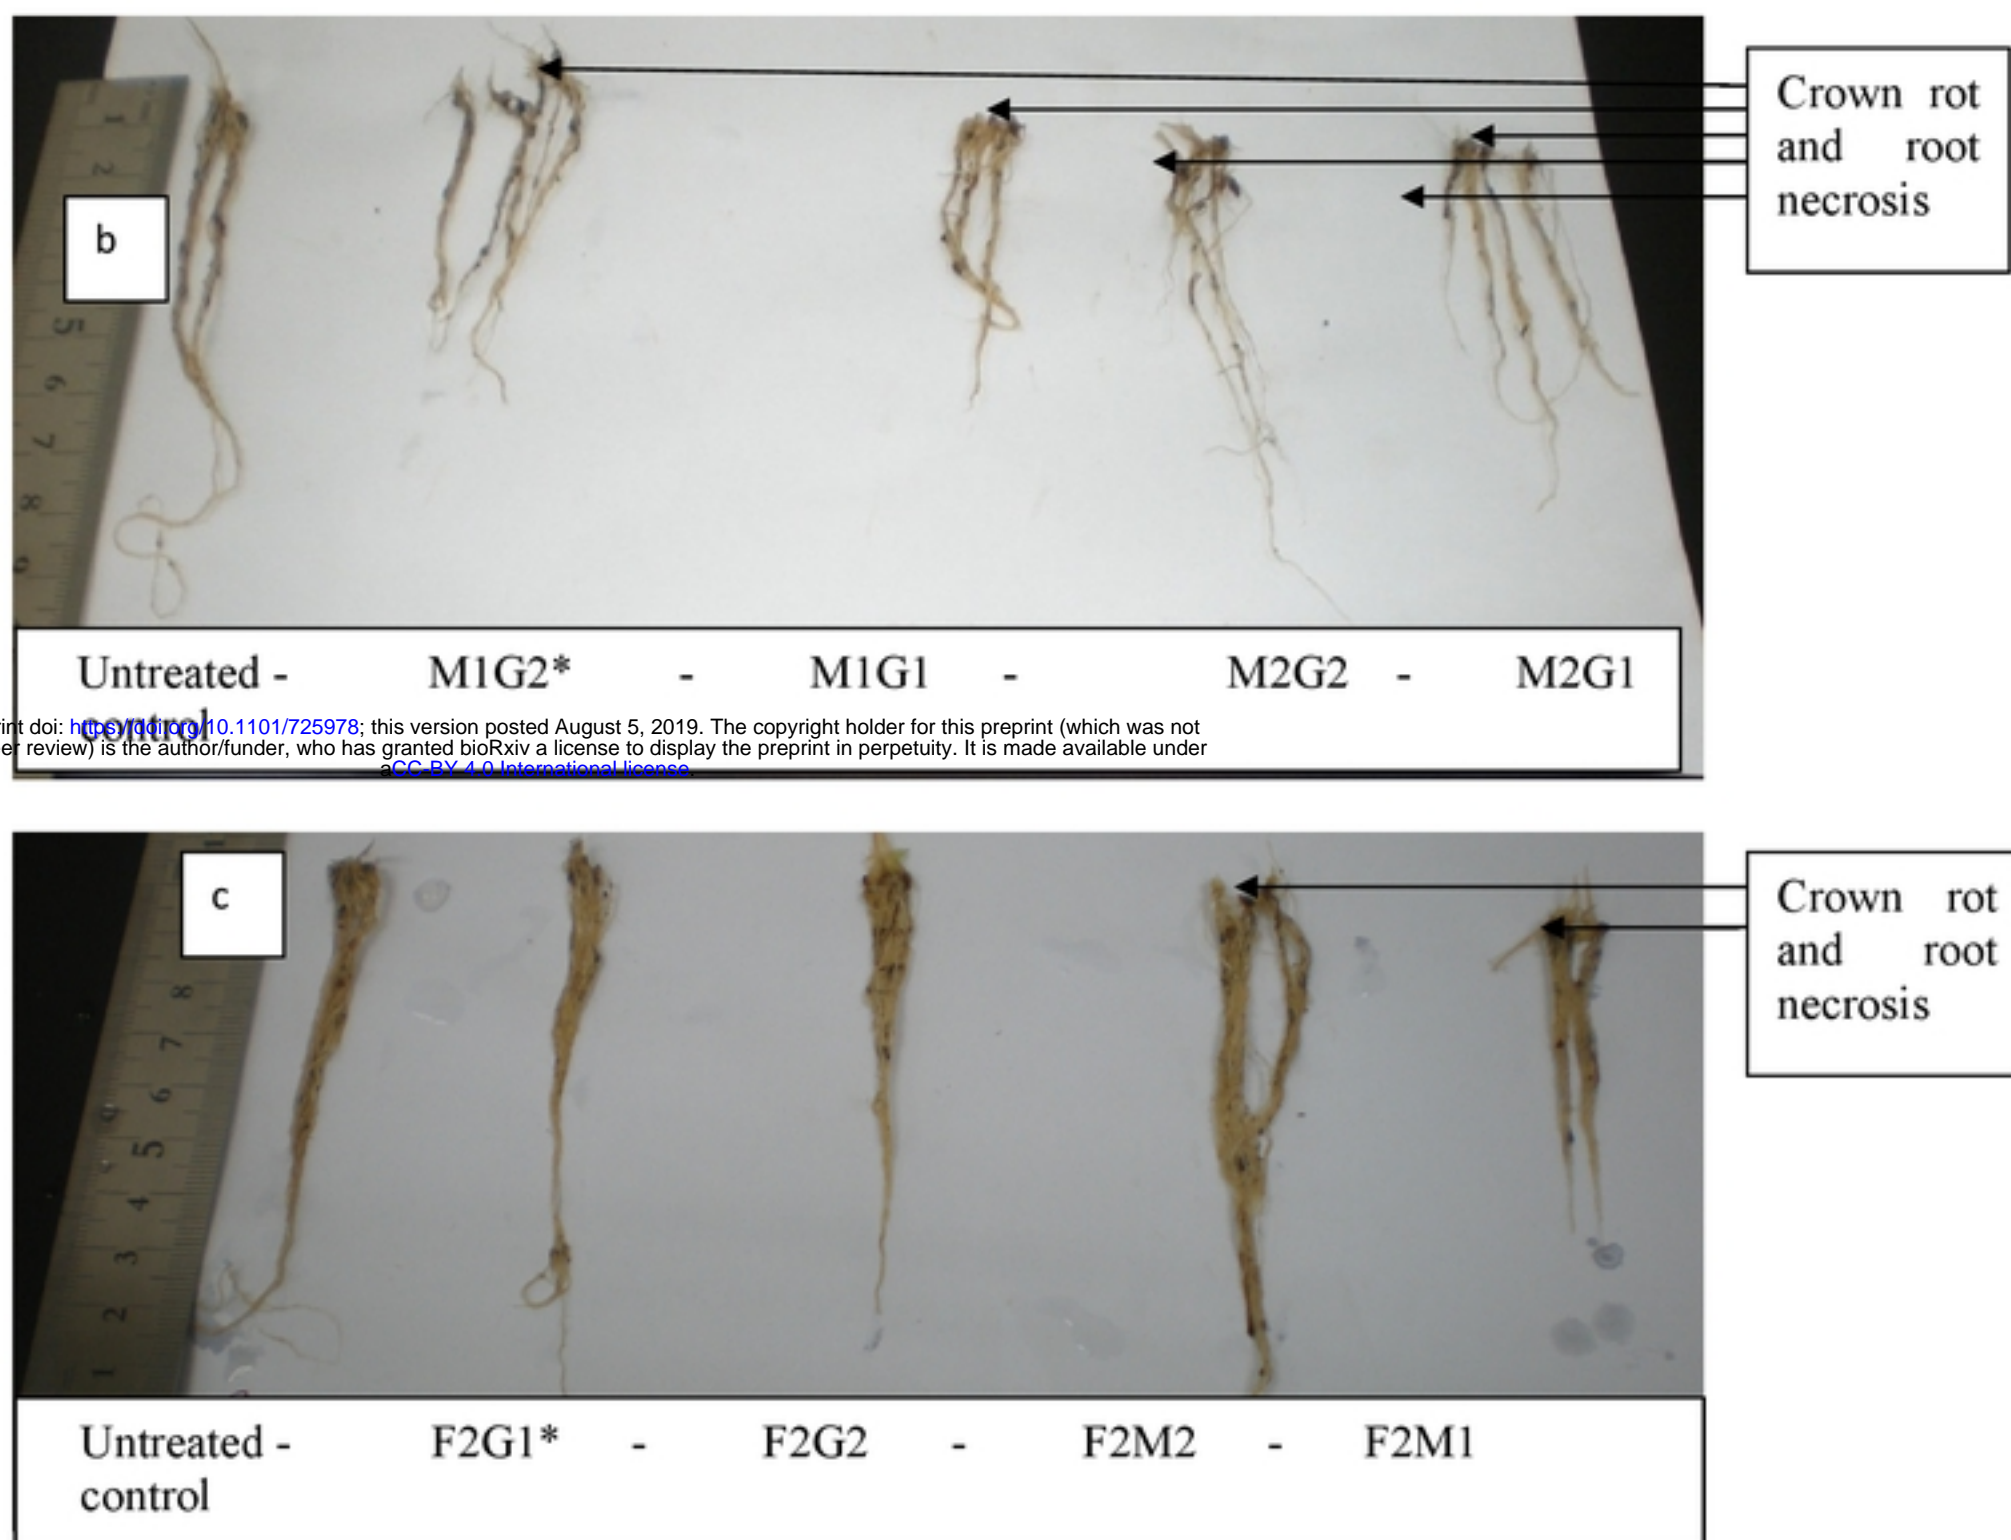

**Figure 4: Plant roots showing different architectures when seeds were pre-treated with two treatment mixtures. [mixtures with MON and GA<sub>3</sub> (a) and mixtures with FA and GA<sub>3</sub> and mixtures with FA and MON (b)] \*G1= GA<sub>3</sub> (10 mg/L), G2= GA<sub>3</sub> (15 mg/L), F1= FA (100 mg/L), F2= FA (400 mg/L), M1= MON (80 μg/L), M2= MON (120 μg/L)]. \*MON = moniliformtn, GA<sub>3</sub> = gibberellic acid, FA= fusaric acid combinations in GA<sub>3</sub> (15 mg/L)\* MON (120 μg/L)\* FA (400 mg/L) (Figure 5).**

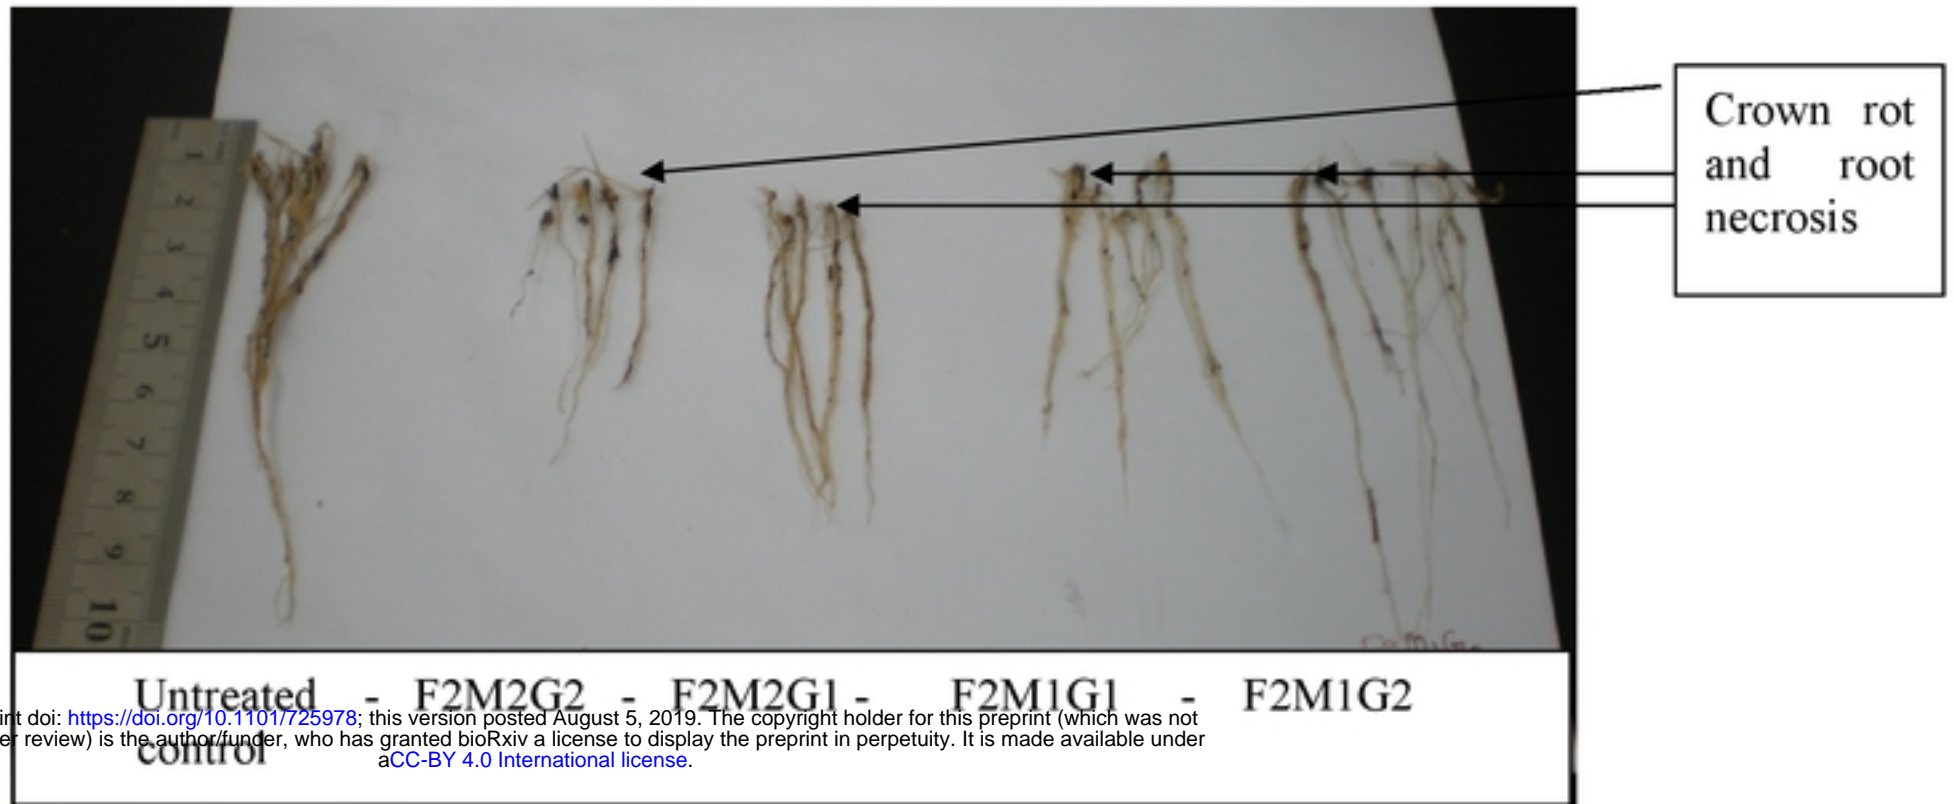

**Figure 5. Crown rot and root necrosis due to the effect of MON in mixtures with three pre-treatment combinations. {\*G1= GA<sub>3</sub> (10 mg/L), G2= GA<sub>3</sub> (15 mg/L), F1= FA (100 mg/L), F2= FA (400 mg/L), M1= MON (80 μg/L), M2= MON (120 μg/L)}. \*MON = moniliformin, GA<sub>3</sub> = gibberellic acid, FA = fusaric acid**
